# Supplementary material for: Ontology-based systematical representation and drug class effect analysis of package insert-reported adverse events associated with cardiovascular drugs used in China
Source: PubMed Central journal article supplement (PMC5653862; doi:10.1038/s41598-017-12580-4), 2017-10-23
Supplement: 41598_2017_12580_MOESM1_ESM.pdf [file 41598_2017_12580_MOESM1_ESM.pdf]

1 **Ontology-based systematical representation and drug class effect analysis**  
2 **of package insert-reported adverse events associated with cardiovascular**  
3 **drugs used in China**

4  
5 **Liwei Wang<sup>1,2,\*</sup>, Mei Li<sup>3</sup>, Jiangan Xie<sup>4,5</sup>, Yuying Cao<sup>1</sup>, Hongfang Liu<sup>2</sup>, Yongqun He<sup>4,5\*</sup>**

- 6  
7 1. Department of Medical Informatics, School of Public Health, Jilin University, Changchun  
8 130021, China  
9 2. Department of Health Sciences Research, Mayo Clinic, Rochester, MN 55901, USA  
10 3. Library, Hebei Medical University, Shijiazhuang, Hebei Province 050017, China  
11 4. Unit for Laboratory Animal Medicine and Department of Microbiology and Immunology,  
12 University of Michigan Medical School, Ann Arbor, MI 48109, USA  
13 5. School of Bioinformatics, Chongqing University of Posts and Telecommunications,  
14 Chongqing, 400065, China  
15 6. Center for Computational Medicine and Bioinformatics, University of Michigan Medical  
16 School, Ann Arbor, MI 48109, USA

17  
18  
19 \*Corresponding author: [wang.liwei@mayo.edu](mailto:wang.liwei@mayo.edu)

20 \*Corresponding author: [yongqunh@umich.edu](mailto:yongqunh@umich.edu)

21  
22  
23  
24 **Summary of Supplemental Materials:**

25  
26 **Page 2 Supplemental Table S1.** CVD class effect based on 36 CVD ingredient  
27 classification.

28  
29 **Page 3 Supplemental Table S2.** The numbers of drugs and ingredients corresponding to  
30 different Mechanisms of Action (MoA) classes.

34 **Supplemental Table S1. CVD class effect based on 36 CVD ingredient classification**  
 35

| Ingredient class                                                                                | AE                                                 | C-PRR | $\chi^2$ | PCR |
|-------------------------------------------------------------------------------------------------|----------------------------------------------------|-------|----------|-----|
| Fatty Acids<br>(including 3<br>specific drugs:<br>Atorvastatin,<br>Fluvastatin,<br>Fenofibrate) | insomnia AE                                        | 2.88  | 5.22     | 1   |
|                                                                                                 | abdominal pain AE                                  | 3.00  | 5.54     | 1   |
|                                                                                                 | transaminase level increased AE                    | 9.86  | 19.41    | 1   |
|                                                                                                 | myopathy AE                                        | 34.50 | 41.95    | 1   |
|                                                                                                 | myalgia AE                                         | 3.45  | 6.67     | 1   |
|                                                                                                 | blood creatine phosphokinase<br>level increased AE | 9.86  | 19.41    | 1   |
|                                                                                                 | myositis AE                                        | 34.5  | 41.95    | 1   |
|                                                                                                 | rhabdomyolysis AE                                  | 23.00 | 34.43    | 1   |
| Glycosides<br>(including 3<br>ingredients:<br>digoxin,<br>deslanoside, and<br>adenosine)        | vision blurred AE                                  | 5.31  | 10.96    | 1   |

36  
 37 **Note:** Each of the three drugs is statistically significantly associated with each of AEs, which  
 38 is the meaning of the class effect.  
 39

40

41 **Supplemental Table S2.** The numbers of drugs and ingredients corresponding to different  
 42 Mechanisms of Action (MoA) classes  
 43

| MoA classes                                     | No. of drugs | No. of ingredients |
|-------------------------------------------------|--------------|--------------------|
| Cellular or Molecular Interactions [MoA]        | 166          | 65                 |
| Biological Macromolecular Activity [MoA]        | 1            | 1                  |
| Enzyme Interactions [MoA]                       | 33           | 15                 |
| Enzyme Inhibitors [MoA]                         | 31           | 14                 |
| Nucleic Acid Synthesis Inhibitors [MoA]         | 4            | 2                  |
| Nucleoside Synthesis Inhibitors [MoA]           | 4            | 2                  |
| Phosphodiesterase Inhibitors [MoA]              | 1            | 1                  |
| Protease Inhibitors [MoA]                       | 11           | 4                  |
| Angiotensin-converting Enzyme Inhibitors [MoA]  | 11           | 4                  |
| Sterol Synthesis Inhibitors [MoA]               | 11           | 5                  |
| Cholesterol Synthesis Inhibitors [MoA]          | 11           | 5                  |
| Physiochemical Activity [MoA]                   | 19           | 3                  |
| Receptor Interactions [MoA]                     | 97           | 39                 |
| Active Transporter Interactions [MoA]           | 8            | 4                  |
| Neurotransmitter Transporter Interactions [MoA] | 3            | 1                  |
| Norepinephrine Transporter Interactions [MoA]   | 3            | 1                  |
| Small Ion Transport Pump Interactions [MoA]     | 2            | 2                  |
| G-Protein-linked Receptor Interactions [MoA]    | 32           | 20                 |
| Adrenergic Receptor Interactions [MoA]          | 25           | 16                 |
| Adrenergic Agonists [MoA]                       | 13           | 8                  |
| Adrenergic alpha-Agonists [MoA]                 | 4            | 2                  |
| Adrenergic Antagonists [MoA]                    | 10           | 6                  |
| Adrenergic alpha-Antagonists [MoA]              | 4            | 2                  |
| Adrenergic beta-Agonists [MoA]                  | 3            | 1                  |
| Ion Channel Interactions [MoA]                  | 57           | 17                 |
| Calcium Channel Interactions [MoA]              | 38           | 10                 |
| Calcium Channel Antagonists [MoA]               | 37           | 9                  |

44

45
